# Supplementary material
Source: Research Square preprint supplement (doi:10.21203/rs.3.rs-9622605/v1)
Supplement: Supplementary file 1 [file 684843015cc3cd4d1b70345c.docx]

Supplementary Table 1. Treatment modalities of the patients

| Treatment | UC n=26 | CD n= 17 |
| --- | --- | --- |
| 5ASA n=18 | 15 | 3 |
| AZA n=10 | 5 | 5 |
| IFX n=8 | 1 | 7 |
| AZA and Biologic n=5 | 3 (1 vedoluzimab, 2 IFX) | 2 (1 IFX, 1 stelera) |
| Corticosteroid | 1 | - |
| UN | 1 | 2 |

AZA: Aza&thioprine, IFX: infliximab, UC: Ulcerative Colitis, CD: Crohn’s Disease

Supplementary Table 2. Proportion of anxious and depressed patients in the study groups

| N (%) | UC n=26 | CD n=19 | HC n=38 | Chi square |
| --- | --- | --- | --- | --- |
| HAD-A >10 | 6 (23,1%) | 6 (31.6%) | 3 (7.9%) | P=0.066 |
| HAD-A ≤10 | 20 (76.9%) | 13 (68.4%) | 35 (92.1%) |  |
| Fisher’s* | P= 0.14 | P=0.048 |  |  |
| HAD-D > 7 | 11 (42.3%) | 8 (42.1%) | 6 (15.8%) | P=0.033 |
| HAD-D ≤ 7 | 15 (57.7%) | 11 (57.9%) | 32 (82.4%) |  |
| Fisher’s* | P = 0.024 | P=0.049 |  |  |

UC: Ulcerative Colitis, CD: Crohn’s Disease, HC: Healthy Controls, HAD-A: Hospital Anxiety Depression Questionnaire- Anxiety Score. HAD-D: Hospital Anxiety Depression Questionnaire- Depression Score

Supplementary Table.3. Proportion of anxious and depressed patients according to gender in the study groups,

| N (%) | UC n=26 | | CD n=19 | | HC n=38 | | IBD n=45 | |
| --- | --- | --- | --- | --- | --- | --- | --- | --- |
| n | F n=8 | M n=18 | F n=7 | M n=12 | Fn=14 | Mn=24 | F n=15 | M n=30 |
| HAD-A >10 | 3 | 3 | 4 | 2 | 1 | 2 | 7 | 5 |
| HAD-A ≤10 | 5 | 15 | 3 | 10 | 13 | 22 | 8 | 25 |
| Fisher’s * | P=0.33 | | P=0.1 | |  |  | P=0.07 | |
| HAD-D > 7 | 4 | 7 | 2 | 6 | 2 | 4 | 6 | 13 |
| HAD-D ≤ 7 | 4 | 11 | 5 | 6 | 12 | 20 | 9 | 17 |
| Fisher’s* | P=0.68 | | P=0.6 | |  | | P=1 | |

UC: Ulcerative Colitis, CD: Crohn’s Disease, HC: Healthy Controls, HAD-A: Hospital Anxiety Depression Questionnaire- Anxiety Score. HAD-D: Hospital Anxiety Depression Questionnaire- Depression Score, M: males, F: Females

SupplementaryTable.4. Number of anxious and depressed patients according to treatment modality in IBD patients

| N (%) | UC n=26 | | CD n=19 | | IBD n=45 | |
| --- | --- | --- | --- | --- | --- | --- |
| n | 5ASA | AZA&B | 5ASA | AZA&B | 5ASA | AZA&B |
| HAD-A >10 | 3 | 3 | 2 | 4 | 5 | 7 |
| HAD-A ≤10 | 12 | 7 | 1 | 10 | 13 | 17 |
| Fisher’s * | P=0.65 | | P=0.5 | | P=1 | |
| HAD-D > 7 | 5 | 5 | 1 | 6 | 6 | 11 |
| HAD-D ≤ 7 | 10 | 5 | 2 | 8 | 12 | 13 |
| Fisher’s* | P=0.44 | | P=1 | | P=0.53 | |

UC: Ulcerative Colitis, CD: Crohn’s Disease, IBD: İnflammatory Bowel Disease, HAD-A: Hospital Anxiety Depression Questionnaire- Anxiety Score. HAD-D: Hospital Anxiety Depression Questionnaire- Depression Score, AZA&B: Azathioprine&any biological agent
